# Supplementary material for: MoS2 quantum dot-decorated CNT networks as a sulfur host for enhanced electrochemical kinetics in advanced lithium–sulfur batteries
Source: Royal Society of Chemistry journal article supplement (doi:10.1039/d4na00068d), 2024-01-01
Supplement: d4na00068d1.pdf [file d4na00068d1.pdf]

Supporting Information

MoS<sub>2</sub> Quantum Dots-Decorated CNTs Networks as Sulfur Host Enhanced Electrochemical  
Kinetics for Advanced Lithium–Sulfur Batteries

Meng Wei<sup>1,2,\*</sup>, Hanqing Lu<sup>1</sup>, Zhen Wang<sup>1</sup>, Baowen Lu<sup>1</sup>, Pengtao Wang<sup>1</sup>, Xinxin Zhang<sup>1</sup>,  
Bingjie Feng<sup>1</sup>, Yingjie Xie<sup>1</sup>, Tao Zhang<sup>1</sup>, Guanghui Liu<sup>1</sup>, Song Xu<sup>1,\*</sup>

<sup>1</sup>School of Materials Science and Engineering, Zhengzhou University of Aeronautics, Zhengzhou  
450046; Henan Key laboratory of Aeronautical materials and Application Technology, Zhengzhou  
450015, China

<sup>2</sup>Collaborative Innovation Center of Aviation Economy Development, Henan Province

\*Corresponding author: [weimeng1005@zua.edu.cn](mailto:weimeng1005@zua.edu.cn); [songxu@zua.edu.cn](mailto:songxu@zua.edu.cn)

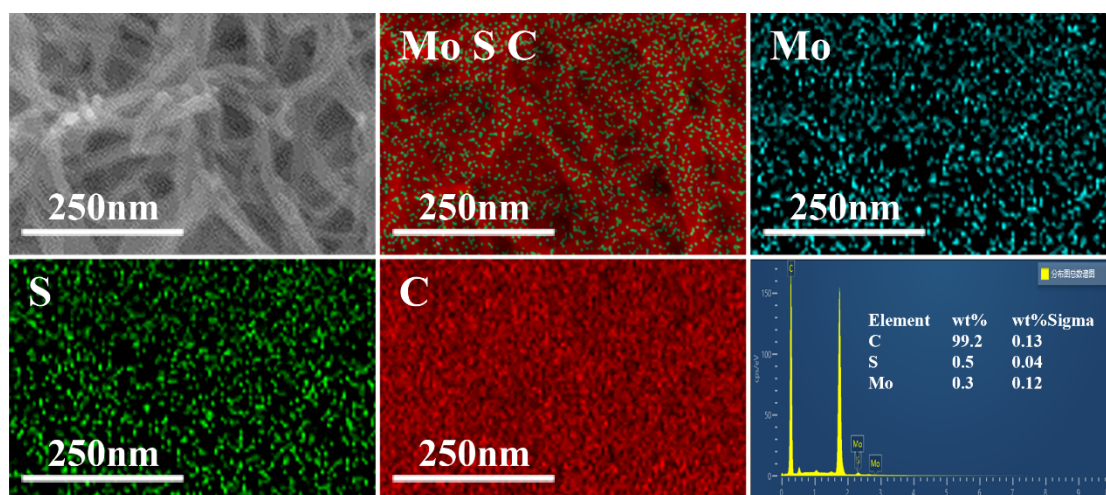

Figure S1 SEM image and corresponding EDS mappings of MoS<sub>2</sub> QDs-CNTs/S.

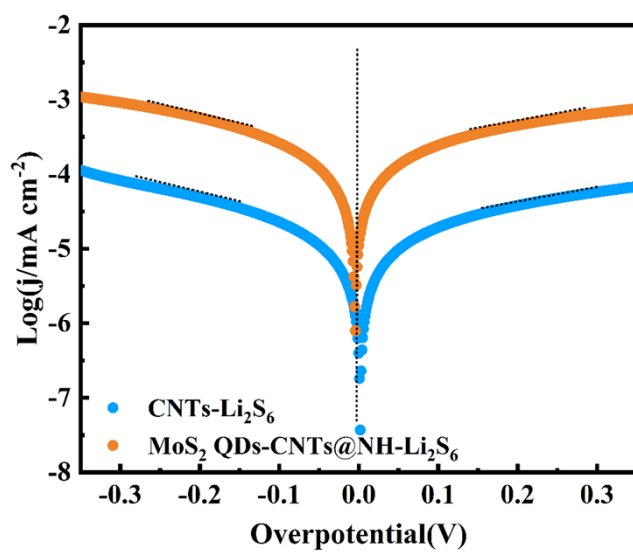

Figure S2 Tafel plots of the  $\text{Li}_2\text{S}_6$  electrolyte on CNTs and  $\text{MoS}_2$  QDs-CNTs@NH surfaces

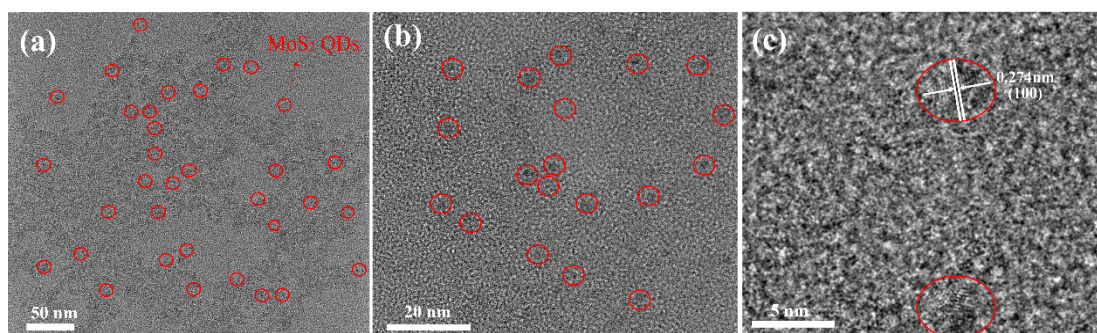

Figure S3 TEM plots of different multiples of  $\text{MoS}_2$  QDs

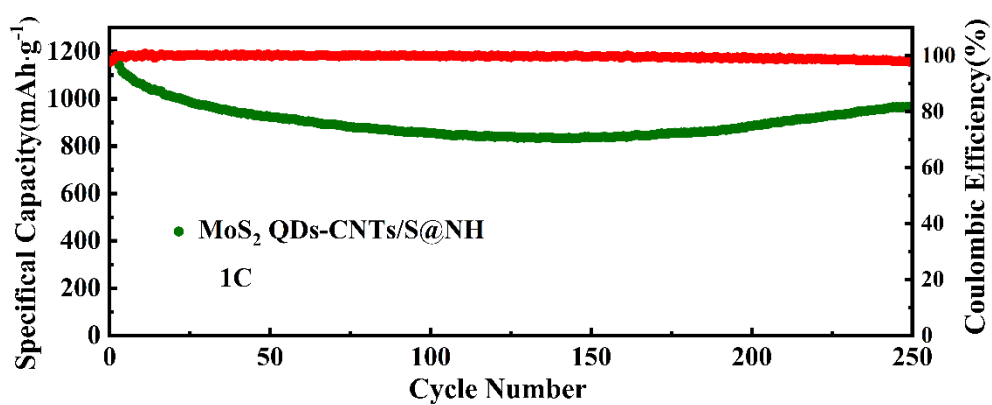

Figure S4 The cycling performance of  $\text{MoS}_2$  QDs-CNTs/S@NH cathode at 1 C.

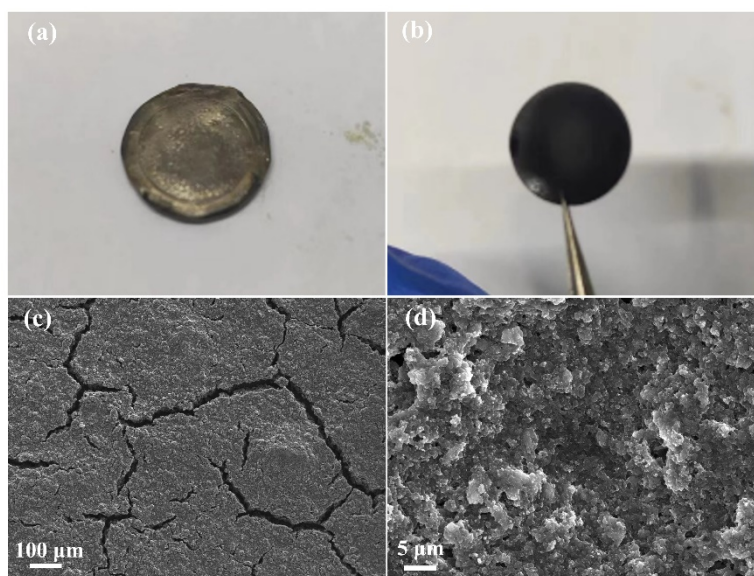

Figure S5. morphology of lithium anode and MoS<sub>2</sub>-CNTs/S@NH composites after 200 cycles at 2 C current density.

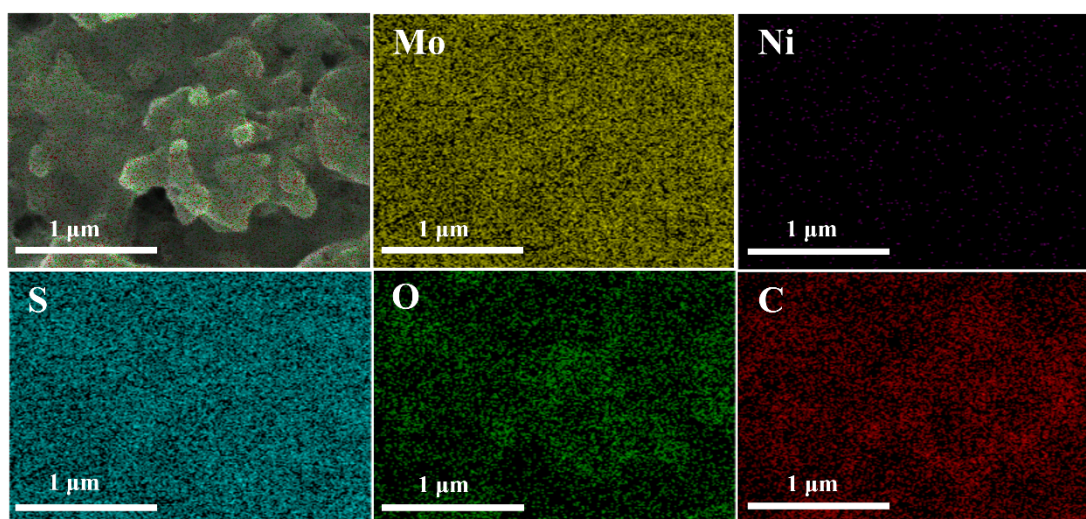

Figure S6. The Surface morphology of MoS<sub>2</sub> QD-CNTs/S@NH in the discharged state after 200 cycles at 2 C, and its EDS mapping results (Fig. 3f).

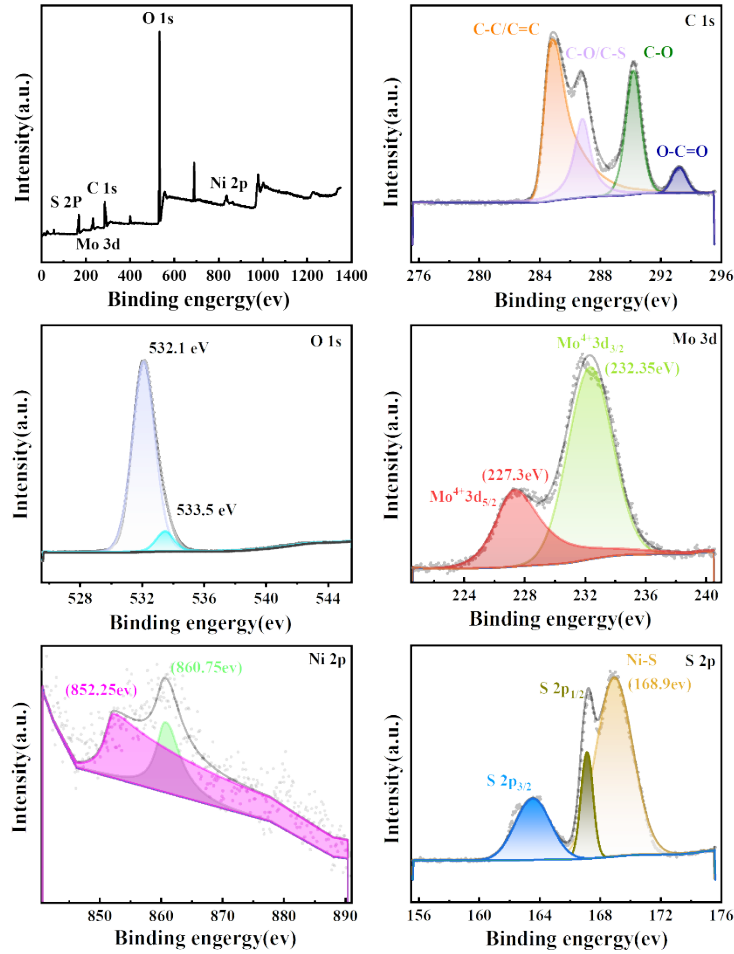

Figure S7. the XPS spectra of the MoS<sub>2</sub> QDs-CNTs/S@NH sample after 200 cycles at 2 C current density: (a) overall XPS spectrum, (b) C 1s, (c) O 1s, (d) Mo 3d, (e) Ni 2p, and (f) S 2p XPS spectra.

Table R1 Electrochemical properties of sulfur-based cathode in this work and literature.

| Cathode material                                | Initial specific capacity /Current density | Capacity after cycling (Cycle number) | Reference |
|-------------------------------------------------|--------------------------------------------|---------------------------------------|-----------|
| MoS <sub>2</sub> QDs-CNTs/S@Ni(OH) <sub>2</sub> | 1141.4/0.5 C                               | 884.6 (200)                           | This work |
| MoS <sub>2</sub> /CNTs-S                        | 1271/0.5 C                                 | 676.1 (73)                            | R1        |
| S/MoS <sub>2</sub> @G-PCNFs                     | 820/1 C                                    | 594 (500)                             | R2        |
| HFSMS/S                                         | 776/0.5 C                                  | 430 (200)                             | R3        |
| CoP@MoS <sub>2</sub> -0.75                      | 1016.7/0.5 C                               | 759 (250)                             | R4        |
| S/CN/MoS <sub>2</sub>                           | 930/0.5 C                                  | 420 (100)                             | R5        |
| 1T-MoS <sub>2</sub> -CNF                        | 890/0.1 C                                  | 820 (100)                             | R6        |
| MoS@rGO/S                                       | 1039.1/0.5 C                               | 848.4 (200)                           | R7        |
